# Supplementary material
Source: PubMed Central journal article supplement (PMC1933453)

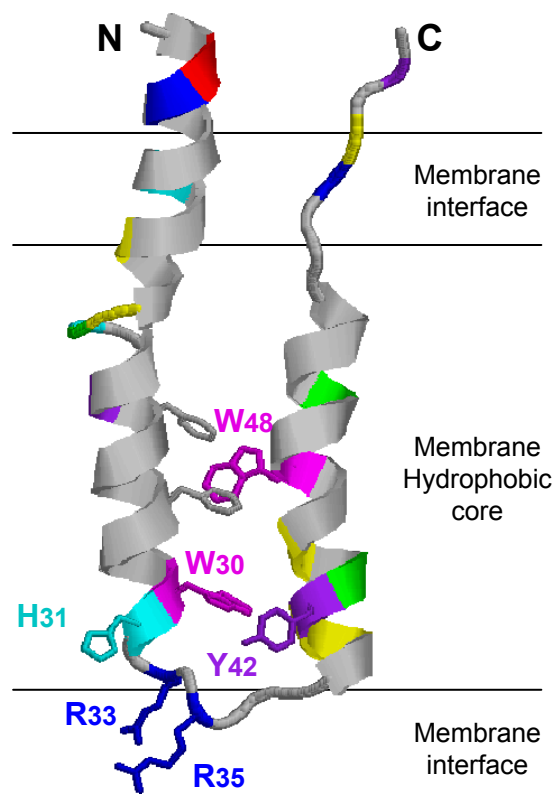

Fig. S1

Supplement: ppat.0030103.sg001.pdf [file ppat.0030103.sg001.pdf]
